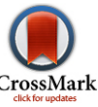

# Identification of Suitable Reference Genes for Gene Expression Studies of Shoulder Instability

Mariana Ferreira Leal<sup>1,2\*</sup>, Paulo Santoro Belangero<sup>1</sup>, Carina Cohen<sup>1</sup>, Eduardo Antônio Figueiredo<sup>1</sup>, Leonor Casilla Loyola<sup>1,2</sup>, Alberto Castro Pochini<sup>1</sup>, Marília Cardoso Smith<sup>2</sup>, Carlos Vicente Andreoli<sup>1</sup>, Sintia Iole Belangero<sup>2,3</sup>, Benno Ejnisman<sup>1</sup>, Moises Cohen<sup>1</sup>

**1** Departamento de Ortopedia e Traumatologia, Universidade Federal de São Paulo, São Paulo, São Paulo, Brazil, **2** Disciplina de Genética, Departamento de Morfologia e Genética, Universidade Federal de São Paulo, São Paulo, São Paulo, Brazil, **3** Laboratório Interdisciplinar de Neurociência Clínica, Departamento de Psiquiatria, Universidade Federal de São Paulo, São Paulo, São Paulo, Brazil

## Abstract

Shoulder instability is a common shoulder injury, and patients present with plastic deformation of the glenohumeral capsule. Gene expression analysis may be a useful tool for increasing the general understanding of capsule deformation, and reverse-transcription quantitative polymerase chain reaction (RT-qPCR) has become an effective method for such studies. Although RT-qPCR is highly sensitive and specific, it requires the use of suitable reference genes for data normalization to guarantee meaningful and reproducible results. In the present study, we evaluated the suitability of a set of reference genes using samples from the glenohumeral capsules of individuals with and without shoulder instability. We analyzed the expression of six commonly used reference genes (*ACTB*, *B2M*, *GAPDH*, *HPRT1*, *TBP* and *TFRC*) in the antero-inferior, antero-superior and posterior portions of the glenohumeral capsules of cases and controls. The stability of the candidate reference gene expression was determined using four software packages: NormFinder, geNorm, BestKeeper and DataAssist. Overall, *HPRT1* was the best single reference gene, and *HPRT1* and *B2M* composed the best pair of reference genes from different analysis groups, including simultaneous analysis of all tissue samples. GenEx software was used to identify the optimal number of reference genes to be used for normalization and demonstrated that the accumulated standard deviation resulting from the use of 2 reference genes was similar to that resulting from the use of 3 or more reference genes. To identify the optimal combination of reference genes, we evaluated the expression of *COL1A1*. Although the use of different reference gene combinations yielded variable normalized quantities, the relative quantities within sample groups were similar and confirmed that no obvious differences were observed when using 2, 3 or 4 reference genes. Consequently, the use of 2 stable reference genes for normalization, especially *HPRT1* and *B2M*, is a reliable method for evaluating gene expression by RT-qPCR.

**Citation:** Leal MF, Belangero PS, Cohen C, Figueiredo EA, Loyola LC, et al. (2014) Identification of Suitable Reference Genes for Gene Expression Studies of Shoulder Instability. PLoS ONE 9(8): e105002. doi:10.1371/journal.pone.0105002

**Editor:** Tim Douglas Aumann, Florey Institute of Neuroscience & Mental Health, Australia

**Received:** May 8, 2014; **Accepted:** July 15, 2014; **Published:** August 14, 2014

**Copyright:** © 2014 Leal et al. This is an open-access article distributed under the terms of the Creative Commons Attribution License, which permits unrestricted use, distribution, and reproduction in any medium, provided the original author and source are credited.

**Data Availability:** The authors confirm that all data underlying the findings are fully available without restriction. All relevant data are within the paper.

**Funding:** This study was supported by Conselho Nacional de Desenvolvimento Científico e Tecnológico (CNPq; MC and MACS) and Fundação de Amparo à Pesquisa do Estado de São Paulo (FAPESP; MFL, and MC) as grants and fellowship awards. The funders had no role in study design, data collection and analysis, decision to publish, or preparation of the manuscript.

**Competing Interests:** The authors have declared that no competing interests exist.

\* Email: mariana.morf@epm.br

## Introduction

Shoulder dislocation occurs in 1 to 2% of the population [1], and traumatic injuries account for 95% of shoulder dislocation episodes [2]. These shoulder injuries are frequently observed in young athletes that are involved in competitive sports [3], and shoulder instability (SI) is often observed after the initial episode of shoulder dislocation, with a recurrence rate of up to 100% in young athletes [4,5].

After episodes of shoulder dislocation, SI patients present plastic deformation of the glenohumeral capsule [6,7]. Although the antero-inferior (AI) region of the capsule is the most frequently injured site [7,8], previous macroscopic analysis of the collagen fiber bundle architecture in the AI region of the glenohumeral capsule revealed that a system of bundles spirally crossing one another permits the entire capsule to resist tensile and shear loads

[9]. As a result, there is a reciprocal load-sharing relationship within the capsule whereby tensile load in either the anterior or superior structures is concomitant with laxity in the posterior (P) or inferior portion, respectively [7], suggesting that different portions of the capsule may be modified in traumatic anterior SI cases.

Currently, little is known about capsule biology, especially in patients with SI. An improved understanding of the underlying biology will be important for guiding patient management and development of new therapeutic options that will be complementary to surgery. Our group recently began investigating alterations in gene expression in SI, as gene expression analysis has previously been used to increase understanding of the molecular events involved in other traumatic sport injuries such as ligament [10,11] and tendon injuries (for a review, see [12]).

As a result of its accuracy, sensitivity and capacity for high throughput analysis, reverse-transcription quantitative polymerase

chain reaction (RT-qPCR) is currently considered to be the gold standard technique for evaluation of gene expression [13]; furthermore, this technique is commonly used to validate data obtained by other methods [14].

To obtain reliable data using RT-qPCR, gene expression levels must be normalized using internal controls within each sample [15]. The use of one or more reference genes can correct biases caused by variations in the complementary DNA (cDNA) input or the efficiency of reverse transcription or amplification. Ideally, reference genes should be stably expressed or at least vary only slightly in expression in all tissues or cells under the conditions of the experiment [16].

Although several genes are commonly used as controls (e.g., *GAPDH* and *ACTB*), they can also be regulated and expressed at varying levels [17]. Because the quality of data from gene expression analyses is affected by the quality of reference genes used, it is recommended that reference gene expression stability be validated for each target tissue and disease [18,19].

The suitability of reference genes has been evaluated in some human musculoskeletal disease such as osteoarthritic articular cartilage (hip and knee) [20], human lumbar vertebral endplate with modic changes [21] and skeletal muscle with chronic degenerative changes [22]. However, to our knowledge no previous studies have identified the best individual or set of reference genes for gene expression analysis from samples of shoulder capsules.

In this study, we assessed the suitability of six reference genes frequently used in the literature (*ACTB*, *B2M*, *GAPDH*, *HPRT1*, *TBP* and *TFRC*) using samples from 3 sites within the glenohumeral capsule [AI, antero-superior (AS) and P portions] of SI patients and control individuals by analyzing gene stability using 4 freely available software packages.

## Materials and Methods

### Patients

We tested tissue samples from 13 patients with traumatic anterior SI from São Paulo Hospital of the Federal University of São Paulo (UNIFESP), Brazil. All of the patients were treated with shoulder immobilization for a minimum of 2 weeks following the first episode of shoulder dislocation and underwent arthroscopic surgical treatment for SI.

Additionally, 5 patients who underwent arthroscopically assisted treatment for acromioclavicular dislocation were included in this study as a control group. These patients did not present with any history of SI or signs of SI injury under anesthesia; furthermore, we did not find any radiological indications of glenohumeral capsule alterations. All control patients were physically active. Table 1 displays the main clinical outcomes of the studied cases and controls.

The study was approved by the ethics committee of the UNIFESP. Written informed consent with approval of the ethics committee was obtained from all patients prior to specimen collection.

### Tissue samples

During the arthroscopic procedures, tissue samples were obtained from the AI, AS and P sites of the glenohumeral capsule of each patient. Biopsy samples from the AI and AS sites were obtained using the scope in the posterior portal and the basket grasper in the anterior portal. The AI specimen was taken from the most inferior region of the glenohumeral capsule next to the inferior glenohumeral ligament, while the AS specimen was taken in the direction of the anterior portal below the biceps tendon, in the rotator interval area. The P specimen was taken in the direction of the posterior portal during evaluation of the posterior capsulolabral complex with the scope in the anterior portal and the basket grasper in the posterior portal.

All tissue specimens were immediately immersed in RNAlater solution (Qiagen, Germany) and stored at -20°C until RNA extraction.

### RNA extraction and cDNA synthesis

Total RNA was extracted using an RNeasy mini kit (Qiagen, Germany) according to the manufacturer's protocol. RNA concentration and quality were determined using a Nanodrop ND-1000 (Thermo Scientific, USA) and the integrity of the RNA was verified by gel electrophoresis on a 1% agarose gel. cDNA was synthesized from 60–100 ng of RNA using a High-Capacity cDNA Archive kit (Life Technologies, USA) according to the manufacturer's protocol.

### RT-qPCR

To detect the range of expression of the six candidate reference genes, reactions were performed in triplicate using TaqMan inventoried Assays-on-Demand probes (Life Technologies, USA) and the Applied Biosystems 7500 fast real-time PCR system.

To identify the best combination of reference genes, we also quantified the mRNA expression of a target gene, *COL1A1* using the candidate reference genes for normalization. *COL1A1* was selected as a target gene since it codified the  $\alpha 1$  chain of human procollagen type I, which is the most prominent protein of the capsule [23]. In addition, upregulation of *COL1A1*, as well as other collagen genes and their protein products, has been reported in several joint injuries, including injured Achilles tendon [12,24], anterior cruciate ligament [25,26,27] and rotator cuff tear [11,28].

For each sample, candidate reference and target genes were run on the same plate to exclude technical variations. The 6 reference genes and target gene are summarized in Table 2.

**Table 1.** Distribution of the clinical outcomes of shoulder instability patients and controls.

| Variable                                         | Cases            | Controls          |
|--------------------------------------------------|------------------|-------------------|
| Age at surgery, years (mean $\pm$ SD)            | 28.42 $\pm$ 6.21 | 30.35 $\pm$ 14.36 |
| Gender (% of male)                               | 92.3%            | 100%              |
| Age of onset, years (mean $\pm$ SD)              | 25.83 $\pm$ 7.38 |                   |
| Duration of condition, years (mean $\pm$ SD)     | 2.7 $\pm$ 3.03   |                   |
| Duration of condition (% of >1 year)             | 84.6%            |                   |
| Number of injuries (% of >1 dislocation episode) | 69.2%            |                   |

doi:10.1371/journal.pone.0105002.t001

**Table 2.** Summary of six reference genes and a target gene.

| Gene symbol   | Name                                     | Accession number | Assay*        | Gene function                                                    |
|---------------|------------------------------------------|------------------|---------------|------------------------------------------------------------------|
| <i>ACTB</i>   | Beta-actin                               | NM_0011101.2     | 4352935E      | Cytoskeletal structural protein                                  |
| <i>B2M</i>    | Beta-2-microglobulin                     | NM_004048.2      | 4333766T      | Beta-chain of major histocompatibility complex class I molecules |
| <i>GAPDH</i>  | Glyceraldehyde-3-phosphate dehydrogenase | NM_002046.3      | 4352934E      | Oxidoreductase in glycolysis and gluconeogenesis                 |
| <i>HPRT1</i>  | Hypoxanthine phosphoribosyl-transferase  | NM_000194.1      | 4333768T      | Purine synthesis in salvage pathway                              |
| <i>TBP</i>    | TATA box binding protein                 | NM_003194.3      | 4333769T      | RNA polymerase II, transcription factor                          |
| <i>TFRC</i>   | Transferrin receptor (CD71)              | NM_003234.1      | 4333770T      | Cellular iron ion homeostasis                                    |
| <i>COL1A1</i> | Collagen, type I, alpha 1                | NM_000088.3      | Hs00164004_m1 | Extracellular matrix structural protein                          |

\*TaqMan probes were purchased as assays-on-demand products for gene expression (Life Technologies, USA).  
doi:10.1371/journal.pone.0105002.t002

The expression of *COL1A1* across the samples was calculated using the equation  $2^{(-\Delta Ct)}$ , in which  $[\Delta Ct (\text{cycle threshold}) = \text{target gene (collagen) Ct} - \text{geometric mean of reference genes Ct}]$ .

### Analysis of reference gene expression stability

We categorized the tissue samples into the following 12 groups: 1) AI samples from cases (SI patients); 2) AS samples from cases; 3) P samples from cases; 4) all tissue samples from cases; 5) AI samples from controls; 6) AS samples from controls; 7) P samples from controls; 8) all tissue samples from controls; 9) all AI samples; 10) all AS samples; 11) all P samples; and 12) all tissue samples.

For comparisons of candidate reference gene stability we used NormFinder (<http://www.mdl.dk/publicationsnormfinder.htm>), geNorm (<http://medgen.ugent.be/~jvdesomp/genorm/>), BestKeeper1 (<http://www.gene-quantification.de/bestkeeper.html>) and DataAssist (<http://www.lifetechnologies.com/us/en/home/technical-resources/software-downloads/dataassist-software.html>) software programs according to the recommendations of the software guides. NormFinder accounts for both intra- and inter-group variations when evaluating the stability of each single reference gene and assigns lower stability values to the genes that are most stably expressed [29]. geNorm calculates the expression stability value (M) for each gene based on the average pairwise expression ratio

between a particular gene and all other reference genes. The most stably expressed gene yields the lowest M value, and then the two most stable reference genes are determined by stepwise exclusion of the least stable gene [15]. BestKeeper was used to rank the 6 reference genes based on the standard deviation (SD) and coefficient of variance (CV) expressed as a percentage of the cycle threshold (Ct) level [30]. Lastly, DataAssist software provided a metric to measure reference gene stability based on the geNorm algorithm. In contrast to the other programs, DataAssist uses RQ to calculate the stability value of individual candidate reference genes.

GenEx software (<http://genex.gene-quantification.info/>) was used to determine the optimal number of reference genes by calculating the accumulated standard deviation (Acc.SD).

## Results

### Reference gene expression levels

The distribution of Ct values for each of the 6 candidate reference genes is shown in Figure 1. These genes displayed a wide range of expression levels. *ACTB* (mean Ct value  $\pm$  SD =  $21.91 \pm 2.327$ ) followed by *B2M* ( $22.08 \pm 2.436$ ) presented the highest expression levels. In contrast, *TFRC* ( $30.11 \pm 2.125$ ) and

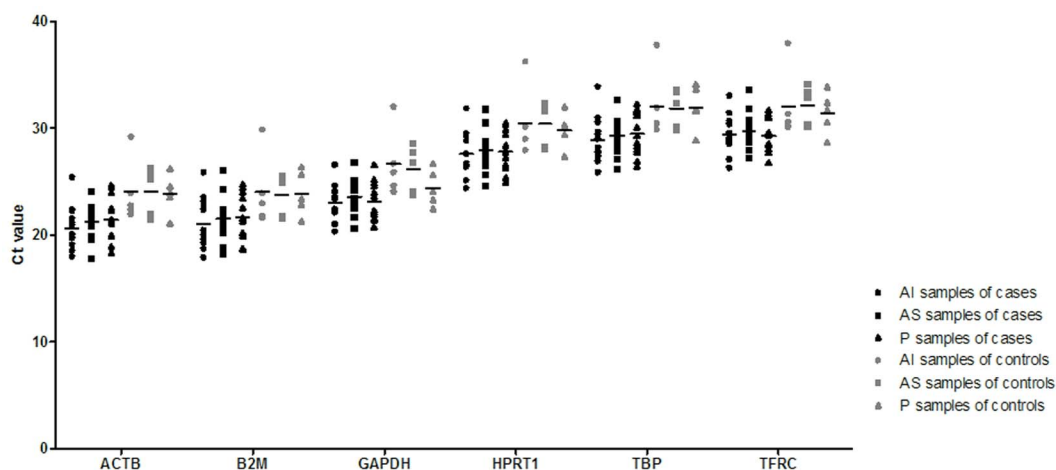

**Figure 1.** RT-qPCR detection of the expression levels of six reference genes. A lower cycle threshold value (Ct) indicates higher gene expression. AI: antero-inferior region of the glenohumeral capsule; AS: antero-superior region of the glenohumeral capsule; P: posterior region of the glenohumeral capsule.

doi:10.1371/journal.pone.0105002.g001

**Table 3.** Ranking of the candidate single reference genes by each software package used.

| NormFinder              |              | geNorm   |              | BestKeeper |              | DataAssist |              |
|-------------------------|--------------|----------|--------------|------------|--------------|------------|--------------|
| Stability value*        | Ranking      | M value* | Ranking      | CV*        | Ranking      | Score*     | Ranking      |
| All samples of cases    |              |          |              |            |              |            |              |
| 0.193                   | <i>HPRT1</i> | 0.419    | <i>TFRC</i>  | 4.59       | <i>TFRC</i>  | 0.782      | <i>GAPDH</i> |
| 0.350                   | <i>ACTB</i>  | 0.419    | <i>GAPDH</i> | 5.55       | <i>TBP</i>   | 0.814      | <i>HPRT1</i> |
| 0.414                   | <i>TFRC</i>  | 0.488    | <i>HPRT1</i> | 5.57       | <i>GAPDH</i> | 0.8355     | <i>ACTB</i>  |
| 0.435                   | <i>GAPDH</i> | 0.503    | <i>ACTB</i>  | 6.15       | <i>HPRT1</i> | 1.055      | <i>TBP</i>   |
| 0.599                   | <i>B2M</i>   | 0.572    | <i>B2M</i>   | 7.16       | <i>ACTB</i>  | 1.131      | <i>TFRC</i>  |
| 0.607                   | <i>TBP</i>   | 0.624    | <i>TBP</i>   | 9.13       | <i>B2M</i>   | 1.467      | <i>B2M</i>   |
| AS samples of cases     |              |          |              |            |              |            |              |
| 0.276                   | <i>HPRT1</i> | 0.246    | <i>HPRT1</i> | 4.10       | <i>TFRC</i>  | 0.768      | <i>GAPDH</i> |
| 0.293                   | <i>GAPDH</i> | 0.246    | <i>B2M</i>   | 4.43       | <i>TBP</i>   | 0.823      | <i>HPRT1</i> |
| 0.463                   | <i>TBP</i>   | 0.444    | <i>GAPDH</i> | 4.72       | <i>HPRT1</i> | 0.869      | <i>ACTB</i>  |
| 0.478                   | <i>B2M</i>   | 0.528    | <i>TBP</i>   | 5.06       | <i>GAPDH</i> | 0.923      | <i>TFRC</i>  |
| 0.486                   | <i>TFRC</i>  | 0.562    | <i>TFRC</i>  | 5.18       | <i>ACTB</i>  | 0.933      | <i>TBP</i>   |
| 0.593                   | <i>ACTB</i>  | 0.611    | <i>ACTB</i>  | 6.39       | <i>B2M</i>   | 1.611      | <i>B2M</i>   |
| P samples of cases      |              |          |              |            |              |            |              |
| 0.179                   | <i>HPRT1</i> | 0.337    | <i>B2M</i>   | 4.41       | <i>TFRC</i>  | 0.861      | <i>HPRT1</i> |
| 0.468                   | <i>B2M</i>   | 0.337    | <i>ACTB</i>  | 5.39       | <i>HPRT1</i> | 0.987      | <i>TBP</i>   |
| 0.520                   | <i>ACTB</i>  | 0.359    | <i>HPRT1</i> | 5.91       | <i>TBP</i>   | 1.087      | <i>GAPDH</i> |
| 0.521                   | <i>TBP</i>   | 0.488    | <i>TBP</i>   | 6.76       | <i>GAPDH</i> | 1.101      | <i>ACTB</i>  |
| 0.610                   | <i>TFRC</i>  | 0.619    | <i>TFRC</i>  | 7.70       | <i>ACTB</i>  | 1.193      | <i>TFRC</i>  |
| 0.933                   | <i>GAPDH</i> | 0.752    | <i>GAPDH</i> | 7.88       | <i>B2M</i>   | 1.462      | <i>B2M</i>   |
| All samples of cases    |              |          |              |            |              |            |              |
| 0.134                   | <i>HPRT1</i> | 0.377    | <i>HPRT1</i> | 4.36       | <i>TFRC</i>  | 0.836      | <i>HPRT1</i> |
| 0.224                   | <i>B2M</i>   | 0.377    | <i>B2M</i>   | 5.36       | <i>TBP</i>   | 0.913      | <i>GAPDH</i> |
| 0.246                   | <i>TBP</i>   | 0.523    | <i>ACTB</i>  | 5.50       | <i>HPRT1</i> | 0.958      | <i>ACTB</i>  |
| 0.254                   | <i>ACTB</i>  | 0.599    | <i>TBP</i>   | 5.87       | <i>GAPDH</i> | 1.012      | <i>TBP</i>   |
| 0.251                   | <i>GAPDH</i> | 0.666    | <i>TFRC</i>  | 6.83       | <i>ACTB</i>  | 1.091      | <i>TFRC</i>  |
| 0.275                   | <i>TFRC</i>  | 0.705    | <i>GAPDH</i> | 7.92       | <i>B2M</i>   | 1.493      | <i>B2M</i>   |
| All samples of controls |              |          |              |            |              |            |              |
| 0.021                   | <i>TBP</i>   | 0.215    | <i>TBP</i>   | 7.10       | <i>TBP</i>   | 0.787      | <i>HPRT1</i> |
| 0.204                   | <i>HPRT1</i> | 0.215    | <i>HPRT1</i> | 7.44       | <i>TFRC</i>  | 0.798      | <i>ACTB</i>  |
| 0.279                   | <i>ACTB</i>  | 0.321    | <i>ACTB</i>  | 7.61       | <i>HPRT1</i> | 0.943      | <i>TBP</i>   |
| 0.353                   | <i>B2M</i>   | 0.389    | <i>B2M</i>   | 8.15       | <i>GAPDH</i> | 0.953      | <i>GAPDH</i> |
| 0.447                   | <i>GAPDH</i> | 0.410    | <i>GAPDH</i> | 8.58       | <i>ACTB</i>  | 1.110      | <i>TFRC</i>  |
| 0.556                   | <i>TFRC</i>  | 0.471    | <i>TFRC</i>  | 9.70       | <i>B2M</i>   | 2.036      | <i>B2M</i>   |
| AS samples of controls  |              |          |              |            |              |            |              |
| 0.265                   | <i>B2M</i>   | 0.221    | <i>HPRT1</i> | 4.85       | <i>TFRC</i>  | 1.063      | <i>HPRT1</i> |
| 0.358                   | <i>HPRT1</i> | 0.221    | <i>B2M</i>   | 4.79       | <i>TBP</i>   | 1.144      | <i>GAPDH</i> |
| 0.402                   | <i>TBP</i>   | 0.364    | <i>TBP</i>   | 6.13       | <i>HPRT1</i> | 1.180      | <i>ACTB</i>  |
| 0.436                   | <i>ACTB</i>  | 0.470    | <i>GAPDH</i> | 6.92       | <i>GAPDH</i> | 1.199      | <i>TFRC</i>  |
| 0.458                   | <i>GAPDH</i> | 0.530    | <i>ACTB</i>  | 7.23       | <i>B2M</i>   | 1.249      | <i>TBP</i>   |
| 0.491                   | <i>TFRC</i>  | 0.561    | <i>TFRC</i>  | 7.94       | <i>ACTB</i>  | 1.4613     | <i>B2M</i>   |
| P samples of controls   |              |          |              |            |              |            |              |
| 0.263                   | <i>TBP</i>   | 0.617    | <i>TFRC</i>  | 3.85       | <i>HPRT1</i> | 1.301      | <i>TBP</i>   |
| 0.303                   | <i>TFRC</i>  | 0.617    | <i>TBP</i>   | 4.69       | <i>TFRC</i>  | 1.351      | <i>HPRT1</i> |
| 0.574                   | <i>HPRT1</i> | 0.685    | <i>HPRT1</i> | 4.73       | <i>TBP</i>   | 1.582      | <i>ACTB</i>  |
| 0.876                   | <i>B2M</i>   | 0.801    | <i>B2M</i>   | 5.20       | <i>ACTB</i>  | 1.639      | <i>GAPDH</i> |
| 0.946                   | <i>ACTB</i>  | 0.893    | <i>ACTB</i>  | 5.66       | <i>GAPDH</i> | 1.702      | <i>TFRC</i>  |
| 1.335                   | <i>GAPDH</i> | 1.064    | <i>GAPDH</i> | 7.06       | <i>B2M</i>   | 1.887      | <i>B2M</i>   |

**Table 3. Cont.**

| NormFinder              |              | geNorm   |              | BestKeeper |              | DataAssist |              |
|-------------------------|--------------|----------|--------------|------------|--------------|------------|--------------|
| Stability value*        | Ranking      | M value* | Ranking      | CV*        | Ranking      | Score*     | Ranking      |
| All samples of controls |              |          |              |            |              |            |              |
| 0.264                   | <i>HPRT1</i> | 0.460    | <i>TBP</i>   | 5.44       | <i>TBP</i>   | 1.164      | <i>TBP</i>   |
| 0.345                   | <i>TFRC</i>  | 0.460    | <i>B2M</i>   | 5.62       | <i>TFRC</i>  | 1.190      | <i>HPRT1</i> |
| 0.370                   | <i>TBP</i>   | 0.573    | <i>ACTB</i>  | 5.77       | <i>HPRT1</i> | 1.244      | <i>ACTB</i>  |
| 0.422                   | <i>ACTB</i>  | 0.637    | <i>HPRT1</i> | 7.25       | <i>ACTB</i>  | 1.457      | <i>GAPDH</i> |
| 0.457                   | <i>B2M</i>   | 0.667    | <i>TFRC</i>  | 7.27       | <i>GAPDH</i> | 1.599      | <i>TFRC</i>  |
| 0.731                   | <i>GAPDH</i> | 0.843    | <i>GAPDH</i> | 7.86       | <i>B2M</i>   | 1.812      | <i>B2M</i>   |
| All AI samples          |              |          |              |            |              |            |              |
| 0.169                   | <i>TBP</i>   | 0.467    | <i>GAPDH</i> | 5.33       | <i>TFRC</i>  | 0.833      | <i>HPRT1</i> |
| 0.207                   | <i>HPRT1</i> | 0.467    | <i>ACTB</i>  | 6.70       | <i>TBP</i>   | 0.880      | <i>GAPDH</i> |
| 0.244                   | <i>ACTB</i>  | 0.541    | <i>HPRT1</i> | 6.99       | <i>HPRT1</i> | 0.852      | <i>ACTB</i>  |
| 0.250                   | <i>B2M</i>   | 0.577    | <i>TBP</i>   | 7.64       | <i>GAPDH</i> | 1.044      | <i>TBP</i>   |
| 0.388                   | <i>GAPDH</i> | 0.608    | <i>B2M</i>   | 8.91       | <i>ACTB</i>  | 1.161      | <i>TFRC</i>  |
| 0.400                   | <i>TFRC</i>  | 0.631    | <i>TFRC</i>  | 9.90       | <i>B2M</i>   | 1.658      | <i>B2M</i>   |
| All AS samples          |              |          |              |            |              |            |              |
| 0.118                   | <i>HPRT1</i> | 0.270    | <i>HPRT1</i> | 5.02       | <i>TBP</i>   | 0.891      | <i>HPRT1</i> |
| 0.125                   | <i>B2M</i>   | 0.270    | <i>B2M</i>   | 5.19       | <i>TFRC</i>  | 0.932      | <i>GAPDH</i> |
| 0.143                   | <i>GAPDH</i> | 0.460    | <i>GAPDH</i> | 5.93       | <i>HPRT1</i> | 0.998      | <i>ACTB</i>  |
| 0.154                   | <i>TBP</i>   | 0.517    | <i>TBP</i>   | 6.24       | <i>GAPDH</i> | 1.045      | <i>TBP</i>   |
| 0.177                   | <i>TFRC</i>  | 0.555    | <i>TFRC</i>  | 6.93       | <i>ACTB</i>  | 1.046      | <i>TFRC</i>  |
| 0.180                   | <i>ACTB</i>  | 0.598    | <i>ACTB</i>  | 7.62       | <i>B2M</i>   | 1.549      | <i>B2M</i>   |
| All P samples           |              |          |              |            |              |            |              |
| 0.183                   | <i>TFRC</i>  | 0.489    | <i>B2M</i>   | 5.45       | <i>TFRC</i>  | 1.000      | <i>HPRT1</i> |
| 0.191                   | <i>HPRT1</i> | 0.489    | <i>ACTB</i>  | 5.94       | <i>HPRT1</i> | 1.075      | <i>TBP</i>   |
| 0.222                   | <i>TBP</i>   | 0.611    | <i>HPRT1</i> | 6.48       | <i>TBP</i>   | 1.244      | <i>ACTB</i>  |
| 0.294                   | <i>B2M</i>   | 0.633    | <i>TBP</i>   | 6.59       | <i>GAPDH</i> | 1.27       | <i>GAPDH</i> |
| 0.328                   | <i>ACTB</i>  | 0.710    | <i>TFRC</i>  | 8.54       | <i>B2M</i>   | 1.322      | <i>TFRC</i>  |
| 0.471                   | <i>GAPDH</i> | 0.864    | <i>GAPDH</i> | 8.61       | <i>ACTB</i>  | 1.546      | <i>B2M</i>   |
| All samples             |              |          |              |            |              |            |              |
| 0.056                   | <i>HPRT1</i> | 0.494    | <i>HPRT1</i> | 5.31       | <i>TFRC</i>  | 0.926      | <i>HPRT1</i> |
| 0.094                   | <i>TBP</i>   | 0.494    | <i>B2M</i>   | 6.12       | <i>TBP</i>   | 1.079      | <i>ACTB</i>  |
| 0.098                   | <i>TFRC</i>  | 0.594    | <i>TBP</i>   | 6.25       | <i>HPRT1</i> | 1.087      | <i>TBP</i>   |
| 0.119                   | <i>ACTB</i>  | 0.626    | <i>ACTB</i>  | 6.88       | <i>GAPDH</i> | 1.114      | <i>GAPDH</i> |
| 0.119                   | <i>B2M</i>   | 0.678    | <i>TFRC</i>  | 8.13       | <i>ACTB</i>  | 1.1927     | <i>TFRC</i>  |
| 0.199                   | <i>GAPDH</i> | 0.756    | <i>GAPDH</i> | 8.68       | <i>B2M</i>   | 1.586      | <i>B2M</i>   |

\*A lower value indicates higher stability in gene expression. AI: antero-inferior region of the glenohumeral capsule; AS: antero-superior region of the glenohumeral capsule; P: posterior region of the glenohumeral capsule.  
doi:10.1371/journal.pone.0105002.t003

*TBP* ( $29.95 \pm 2.358$ ) presented the lowest expression levels in glenohumeral capsule samples.

### Reference gene expression stability

Table 3 displays the stability value ranking of the single candidate reference genes as determined by the different software packages. In our analysis, all reference genes for all analysis groups presented M values less than the geNorm threshold of 1.5 that is recognized as stable.

For most of the analysis groups, the various software packages suggested different single best reference genes, and all four

software packages generated different rankings of reference gene stability for each analysis group.

Typically, gene expression studies compare transcript levels between case (i.e., the injured tissue) and control samples. When considering the AI samples, no single gene was repeatedly identified as being the best reference gene by the various software packages. In contrast, NormFinder, geNorm and DataAssist each identified *HPRT1* as the most stable gene in AS samples, and NormFinder and BestKeeper both identified *TFRC* as the most stable gene in P samples.

In some studies, researchers have investigated a possible association between gene expression and clinical variables. In

**Table 4.** Best pair of reference genes according to each software for each group of sample.

| Samples                 | Best pair of reference genes by software |                            |                                                    |                             |
|-------------------------|------------------------------------------|----------------------------|----------------------------------------------------|-----------------------------|
|                         | NormFinder                               | geNorm                     | BestKeeper                                         | DataAssist                  |
| AI samples of cases     | <i>HPRT1</i> + <i>ACTB</i>               | <i>TFRC</i> + <i>GAPDH</i> | <i>HPRT1</i> + <i>B2M</i>                          | <i>GAPDH</i> + <i>ACTB</i>  |
| AS samples of cases     | <i>HPRT1</i> + <i>GAPDH</i>              | <i>HPRT1</i> + <i>B2M</i>  | <i>HPRT1</i> + <i>B2M</i>                          | <i>HPRT1</i> + <i>GAPDH</i> |
| P samples of cases      | <i>HPRT1</i> + <i>B2M</i>                | <i>ACTB</i> + <i>B2M</i>   | <i>HPRT1</i> + <i>B2M</i>                          | <i>HPRT1</i> + <i>ACTB</i>  |
| All samples of cases    | <i>HPRT1</i> + <i>B2M</i>                | <i>HPRT1</i> + <i>B2M</i>  | <i>HPRT1</i> + <i>B2M</i>                          | <i>HPRT1</i> + <i>ACTB</i>  |
| AI samples of controls  | <i>HPRT1</i> + <i>TBP</i>                | <i>HPRT1</i> + <i>TBP</i>  | <i>TBP</i> + <i>ACTB</i>                           | <i>HPRT1</i> + <i>ACTB</i>  |
| AS samples of controls  | <i>HPRT1</i> + <i>B2M</i>                | <i>HPRT1</i> + <i>B2M</i>  | <i>HPRT1</i> + <i>B2M</i>                          | <i>TBP</i> + <i>TFRC</i>    |
| P samples of controls   | <i>TBP</i> + <i>TFRC</i>                 | <i>TBP</i> + <i>TFRC</i>   | <i>TBP</i> + <i>TFRC</i> / <i>TBP</i> + <i>B2M</i> | <i>TBP</i> + <i>TFRC</i>    |
| All samples of controls | <i>HPRT1</i> + <i>TFRC</i>               | <i>TBP</i> + <i>B2M</i>    | <i>TBP</i> + <i>B2M</i>                            | <i>HPRT1</i> + <i>TBP</i>   |
| All AI samples          | <i>HPRT1</i> + <i>TBP</i>                | <i>GAPDH</i> + <i>ACTB</i> | <i>HPRT1</i> + <i>B2M</i>                          | <i>GAPDH</i> + <i>ACTB</i>  |
| All AS samples          | <i>HPRT1</i> + <i>B2M</i>                | <i>HPRT1</i> + <i>B2M</i>  | <i>HPRT1</i> + <i>B2M</i>                          | <i>GAPDH</i> + <i>ACTB</i>  |
| All P samples           | <i>HPRT1</i> + <i>TFRC</i>               | <i>ACTB</i> + <i>B2M</i>   | <i>ACTB</i> + <i>B2M</i>                           | <i>TBP</i> + <i>TFRC</i>    |
| All samples             | <i>HPRT1</i> + <i>TBP</i>                | <i>HPRT1</i> + <i>B2M</i>  | <i>HPRT1</i> + <i>B2M</i>                          | <i>HPRT1</i> + <i>ACTB</i>  |

AI: antero-inferior region of the glenohumeral capsule; AS: antero-superior region of the glenohumeral capsule; P: posterior region of the glenohumeral capsule.  
doi:10.1371/journal.pone.0105002.t004

the present study, *HPRT1*, followed by *B2M* was the most suitable reference gene for the different tissue categories from cases. For the tissue categories from controls, *TBP* and *HPRT1* were the most stable reference genes.

When all 54 samples were considered, *HPRT1* and *B2M* (M value = 0.494) were identified as the most stably expressed reference genes by geNorm, and *HPRT1* was also identified as the most stable reference gene by the NormFinder and DataAssist software. Moreover, *HPRT1* was the gene most frequently identified as a suitable reference gene when considering all the analysis groups.

Table 4 displays the best combinations of reference genes as suggested by the 4 software packages. Overall, *HPRT1* and *B2M* were the most suitable reference genes, and this pair of genes was the most frequently identified when evaluating all cases or all samples, as well as when evaluating only AS samples. In contrast, *GAPDH* and *ACTB* was the most frequently identified pair from

the analysis of AI samples; *ACTB* and *B2M* was the most frequently identified pair from the analysis of P samples; and *TBP* and *B2M* was the most frequently identified pair of reference genes when all controls were evaluated simultaneously.

The 4 software packages only indicated up to 2 genes as the best combination of reference genes. We used the GenEx software package to determine if reliable normalization would require more than 2 reference genes. In this analysis the optimal number of reference genes is indicated by the lowest SD, and with the exception of the analysis of P site samples from controls, the Acc.SD of 2 reference genes did not differ more than 0.1 from the observed metric when using more than 2 genes (Figure 2).

### Effects of reference gene choice

To validate the selection of the appropriate reference genes for normalization, an expression analysis was performed comparing data from samples of patients with shoulder instability to controls

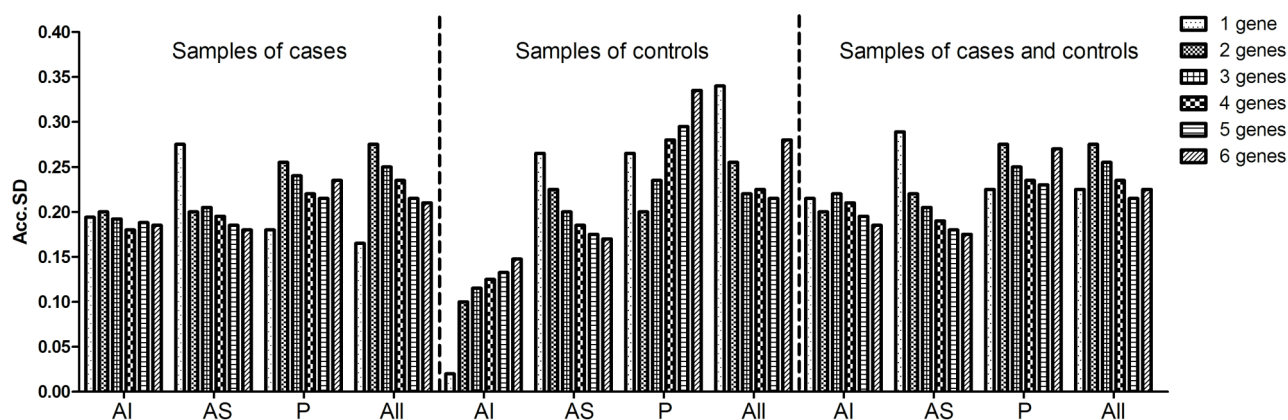

**Figure 2.** Accumulated standard deviation for the 6 reference genes in glenohumeral capsule samples. Lower values of accumulated standard deviation (Acc.SD) indicate the optimal number of reference gene as estimated by the GenEx software package. AI: antero-inferior region of the glenohumeral capsule; AS: antero-superior region of the glenohumeral capsule; P: posterior region of the glenohumeral capsule.  
doi:10.1371/journal.pone.0105002.g002

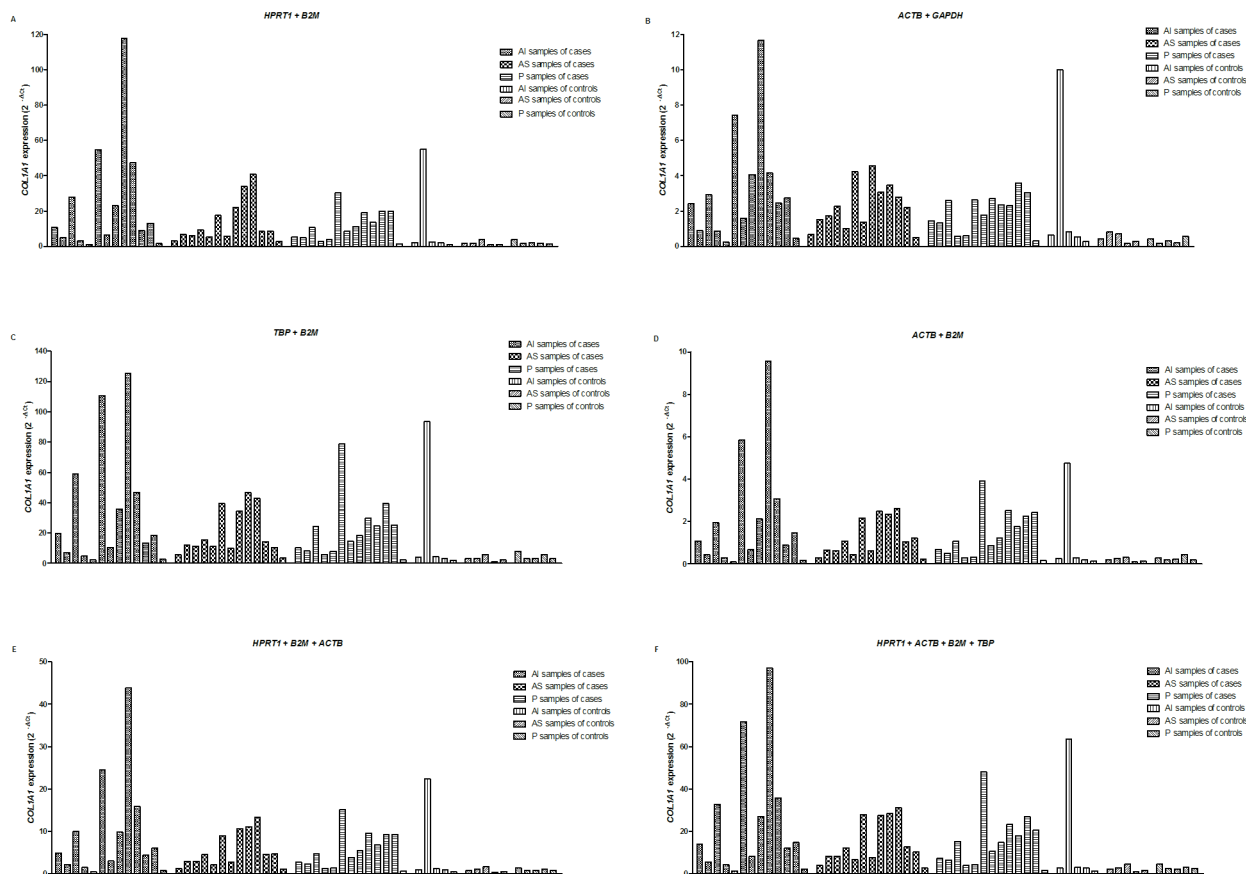

**Figure 3. *COL1A1* expression normalized by different combinations of candidate reference genes in glenohumeral capsule specimens.** AI: antero-inferior region of the glenohumeral capsule; AS: antero-superior region of the glenohumeral capsule; P: posterior region of the glenohumeral capsule.

doi:10.1371/journal.pone.0105002.g003

for the three capsule sites. This analysis was performed using *COL1A1* as a target gene in all the analyses. As reference genes, we used the most frequently identified pairs described above. We also performed the *COL1A1* expression analysis using 3 reference genes (*HPRT1 + B2M + ACTB*) and 4 reference genes (*HPRT1 + B2M + ACTB + TBP*).

Although the normalized expression quantities differed between the various combinations of reference genes, the distributions of *COL1A1* expression in the studied samples were similar (Figure 3). Moreover, *COL1A1* expression was significantly increased in the AS and P sites of the glenohumeral capsule of cases compared to the controls using all the reference genes combinations described above ( $p < 0.05$  for all analyses using the Mann-Whitney test; Table 5). Regardless of the reference gene combination used, *COL1A1* expression in the capsule AI site did not differ between cases and controls ( $p > 0.05$  using the Mann-Whitney test for all analyses; Table 5).

## Discussion

Our group recently began investigating the molecular alterations involved in shoulder instability and other orthopedic lesions. We hypothesized that misregulated expression of several genes may have a role in the capsular deformation observed in SI patients and that such molecular alterations may explain the high rate of shoulder dislocation recurrence after the first episode of traumatic dislocation. Additionally, an increased understanding of

gene expression modification in response to injury may aid in determination of patient prognosis and in the development of new treatment strategies.

RT-qPCR is one of the most commonly utilized approaches in functional genomics research, and its use in gene expression analysis may become routine. However, many authors do not critically evaluate their RT-qPCR experiments, and as a result, the experiments are improperly designed and difficult to repeat due to insufficient data quality [31]. To minimize the influence of differences between samples in the extraction of mRNA, reverse transcription and PCR [17], is necessary to normalize target gene expression by a known factor. Consequently, the use of suitable reference genes with stable expression in the studied tissue (normal and/or injured) is essential for effective data normalization and the acquisition of accurate and meaningful biological data.

Reference genes have been described for RT-qPCR studies in several diseases and tissues [20,21,22,32,33,34,35], and our group recently identified the most stable reference genes in gastric neoplastic and non-neoplastic samples, as well as in gastric cancer cell lines [36]. To the best of our knowledge, no prior study has sought to identify suitable reference genes for gene expression analysis in the glenohumeral capsule.

In the present study, we used 4 software packages (NormFinder, geNorm, BestKeeper, and DataAssist) to evaluate the stability of reference gene expression. Each software package uses distinct algorithms, and as a result, different results can be expected. Therefore, it is important to use more than one software package





when new cohorts of tissue samples are used, we suggest performing specific gene expression studies, in order to identify the most stable reference genes to be used for normalization. However, it is important to highlight that our results may be relevant to the study of SI, as well as to the study of the normal glenohumeral capsule.

## Conclusions

In the present study, we evaluated the suitability of reference genes using samples of glenohumeral capsules from individuals with and without history of shoulder dislocation episodes. Examining the different analysis groups, *HPRT1* appears to be the most suitable reference gene. We observed that 2 reference genes, especially *HPRT1* and *B2M*, might be used in combination

for accurate normalization of RT-qPCR data in studies of molecular alterations in the glenohumeral capsule of SI patients. The results of this work may benefit future studies of the glenohumeral capsule that require more accurate gene expression quantification in this tissue.

## Author Contributions

Conceived and designed the experiments: MFL MC. Performed the experiments: MFL LCL PSB CC EAF. Analyzed the data: MFL SIB MCS. Contributed reagents/materials/analysis tools: PSB BE ACP CVA CC EAF. Contributed to the writing of the manuscript: MFL. Literature search: MFL PSB BE ACP CVA. Contributed to all drafts of the manuscript and approved the final manuscript: MFL PSB CC EAF LCL ACP MCS CVA SIB BE MC.

## References

- Kazar B, Relovszky E (1969) Prognosis of primary dislocation of the shoulder. *Acta Orthop Scand* 40: 216–224.
- Hayes K, Callanan M, Walton J, Paxinos A, Murrell GA (2002) Shoulder instability: management and rehabilitation. *J Orthop Sports Phys Ther* 32: 497–509.
- Buss DD, Lynch GP, Meyer CP, Huber SM, Frechill MQ (2004) Nonoperative management for in-season athletes with anterior shoulder instability. *Am J Sports Med* 32: 1430–1433.
- Larrain MV, Botto GJ, Montenegro HJ, Mauas DM (2001) Arthroscopic repair of acute traumatic anterior shoulder dislocation in young athletes. *Arthroscopy* 17: 373–377.
- te Slaa RL, Wijffels MP, Brand R, Marti RK (2004) The prognosis following acute primary glenohumeral dislocation. *J Bone Joint Surg Br* 86: 58–64.
- Hovellius L, Eriksson K, Fredin H, Hagberg G, Hussenius A, et al. (1983) Recurrences after initial dislocation of the shoulder. Results of a prospective study of treatment. *J Bone Joint Surg Am* 65: 343–349.
- Wang VM, Flatow EL (2005) Pathomechanics of acquired shoulder instability: a basic science perspective. *J Shoulder Elbow Surg* 14: 2S–11S.
- Burkart AC, Debski RE (2002) Anatomy and function of the glenohumeral ligaments in anterior shoulder instability. *Clin Orthop Relat Res*: 32–39.
- Gohlke F, Essigkrug B, Schmitz F (1994) The pattern of the collagen fiber bundles of the capsule of the glenohumeral joint. *J Shoulder Elbow Surg* 3: 111–128.
- Lo IK, Marchuk LL, Hart DA, Frank CB (1998) Comparison of mRNA levels for matrix molecules in normal and disrupted human anterior cruciate ligaments using reverse transcription-polymerase chain reaction. *J Orthop Res* 16: 421–428.
- Shirachi I, Gotoh M, Mitsui Y, Yamada T, Nakama K, et al. (2011) Collagen production at the edge of ruptured rotator cuff tendon is correlated with postoperative cuff integrity. *Arthroscopy* 27: 1173–1179.
- Xu Y, Murrell GA (2008) The basic science of tendinopathy. *Clin Orthop Relat Res* 466: 1528–1538.
- Derveaux S, Vandosomepele J, Hellemans J (2010) How to do successful gene expression analysis using real-time PCR. *Methods* 50: 227–230.
- Kozera B, Rapacz M (2013) Reference genes in real-time PCR. *J Appl Genet* 54: 391–406.
- Vandesompele J, De Preter K, Pattyn F, Poppe B, Van Roy N, et al. (2002) Accurate normalization of real-time quantitative RT-PCR data by geometric averaging of multiple internal control genes. *Genome Biol* 3: RESEARCH0034.
- Li YL, Ye F, Hu Y, Lu WG, Xie X (2009) Identification of suitable reference genes for gene expression studies of human serous ovarian cancer by real-time polymerase chain reaction. *Anal Biochem* 394: 110–116.
- Huggett J, Dheda K, Bustin S, Zumla A (2005) Real-time RT-PCR normalisation; strategies and considerations. *Genes Immun* 6: 279–284.
- Bustin SA, Mueller R (2005) Real-time reverse transcription PCR (qRT-PCR) and its potential use in clinical diagnosis. *Clin Sci (Lond)* 109: 365–379.
- Hruz T, Wyss M, Docquier M, Pfaffl MW, Masanetz S, et al. (2011) RefGenes: identification of reliable and condition specific reference genes for RT-qPCR data normalization. *BMC Genomics* 12: 156.
- Pombo-Suarez M, Calaza M, Gomez-Reino JJ, Gonzalez A (2008) Reference genes for normalization of gene expression studies in human osteoarthritic articular cartilage. *BMC Mol Biol* 9: 17.
- Zhou ZJ, Zhang JF, Xia P, Wang JY, Chen S, et al. (2014) Selection of suitable reference genes for normalization of quantitative real-time polymerase chain reaction in human cartilage endplate of the lumbar spine. *PLoS One* 9: e88892.
- Yuzbasioglu A, Onbasilar I, Kocacae C, Ozcuc M (2010) Assessment of housekeeping genes for use in normalization of real time PCR in skeletal muscle with chronic degenerative changes. *Exp Mol Pathol* 88: 326–329.
- Kaltsas DS (1983) Comparative study of the properties of the shoulder joint capsule with those of other joint capsules. *Clin Orthop Relat Res*: 20–26.
- Eriksen HA, Pajala A, Leppilanti J, Risteli J (2002) Increased content of type III collagen at the rupture site of human Achilles tendon. *J Orthop Res* 20: 1352–1357.
- Clements DN, Carter SD, Innes JF, Ollier WE, Day PJ (2008) Gene expression profiling of normal and ruptured canine anterior cruciate ligaments. *Osteoarthritis Cartilage* 16: 195–203.
- Bramono DS, Richmond JC, Weitzel PP, Chernoff H, Martin I, et al. (2005) Characterization of transcript levels for matrix molecules and proteases in ruptured human anterior cruciate ligaments. *Connect Tissue Res* 46: 53–65.
- Lo IK, Marchuk L, Hart DA, Frank CB (2003) Messenger ribonucleic acid levels in disrupted human anterior cruciate ligaments. *Clin Orthop Relat Res*: 249–258.
- Lo IK, Boorman R, Marchuk L, Hollinshead R, Hart DA, et al. (2005) Matrix molecule mRNA levels in the bursa and rotator cuff of patients with full-thickness rotator cuff tears. *Arthroscopy* 21: 645–651.
- Andersen CL, Jensen JL, Orntoft TF (2004) Normalization of real-time quantitative reverse transcription-PCR data: a model-based variance estimation approach to identify genes suited for normalization, applied to bladder and colon cancer data sets. *Cancer Res* 64: 5245–5250.
- Pfaffl MW, Tichopad A, Prgomet C, Neuvians TP (2004) Determination of stable housekeeping genes, differentially regulated target genes and sample integrity: BestKeeper—Excel-based tool using pair-wise correlations. *Biotechnol Lett* 26: 509–515.
- Bustin SA (2010) Why the need for qPCR publication guidelines? – The case for MIQE. *Methods* 50: 217–226.
- Lyng MB, Laenkholm AV, Pallisgaard N, Ditzel HJ (2008) Identification of genes for normalization of real-time RT-PCR data in breast carcinomas. *BMC Cancer* 8: 20.
- Rubie C, Kempf K, Hans J, Su T, Tilton B, et al. (2005) Housekeeping gene variability in normal and cancerous colorectal, pancreatic, esophageal, gastric and hepatic tissues. *Mol Cell Probes* 19: 101–109.
- Fu J, Bian L, Zhao L, Dong Z, Gao X, et al. (2010) Identification of genes for normalization of quantitative real-time PCR data in ovarian tissues. *Acta Biochim Biophys Sin (Shanghai)* 42: 568–574.
- Wang Q, Ishikawa T, Michiue T, Zhu BL, Guan DW, et al. (2012) Stability of endogenous reference genes in postmortem human brains for normalization of quantitative real-time PCR data: comprehensive evaluation using geNorm, NormFinder, and BestKeeper. *Int J Legal Med* 126: 943–952.
- Wisniewski F, Calcagno DQ, Leal MF, dos Santos LC, Gigeck Cde O, et al. (2013) Reference genes for quantitative RT-PCR data in gastric tissues and cell lines. *World J Gastroenterol* 19: 7121–7128.
- de Jonge HJ, Fehrmann RS, de Bont ES, Hofstra RM, Gerbens F, et al. (2007) Evidence based selection of housekeeping genes. *PLoS One* 2: e898.
